# Supplementary material for: Divine grace and creation care
Source: Royal Society of Chemistry journal article supplement (doi:10.1039/d2ra06489h), 2013-01-01
Supplement: d2ra06489h1.pdf [file d2ra06489h1.pdf]

## Supplementary information:

### Anion exchange on hydrous zirconium oxide materials: application for selective iodate removal

V. Suorsa<sup>1,\*</sup>, M. Otaki<sup>1</sup>, T. Suominen<sup>1</sup>, J. Virkanen<sup>2</sup>, H. Reijola<sup>2</sup>, R. Bes<sup>3,4</sup> and R. Koivula<sup>1</sup>

<sup>1</sup> Radiochemistry Unit, Department of Chemistry, University of Helsinki, A.I. Virtasen aukio 1, 00014 Helsinki, Finland

<sup>2</sup> Department of Geosciences and Geography, University of Helsinki, Gustaf Hällströmin katu 2, 00014 Helsinki, Finland

<sup>3</sup> Department of Physics, University of Helsinki, PO Box 64, FI-00014 Helsinki, Finland

<sup>4</sup> Helsinki Institute of Physics, PO Box 64, FI-00014 Helsinki, Finland

\* Corresponding author. E-mail address: [valtteri.suorsa@helsinki.fi](mailto:valtteri.suorsa@helsinki.fi); ORCID: [0000-0003-1544-5283](https://orcid.org/0000-0003-1544-5283)

## Abstract

The radioactive <sup>129</sup>I is a top-priority radionuclide due to its the long half-life ( $1.57 \times 10^7$  y) and high mobility. Because of the planned and accidental releases to the environment, specific separation technologies are required to limit the potential radiation dose to human beings. Zirconium oxides are known for their adsorption capability and selectivity to oxyanions and here the applicability to selective IO<sub>3</sub><sup>-</sup> removal has been investigated regarding the uptake mechanism, regeneration and competition caused by other anions, like environmentally relevant SO<sub>4</sub><sup>2-</sup>. Granular aggregates of hydrous zirconium oxides with and without Sb doping showed high potential for the selective IO<sub>3</sub><sup>-</sup> removal in the presence of competing anions, like the fore mentioned SO<sub>4</sub><sup>2-</sup> (apparent capacity between 0.1 – 0.4 meq/g depending on SO<sub>4</sub><sup>2-</sup> concentration). The main uptake mechanism was found to be outer-sphere complexation (ion-exchange) to the protonated hydroxyl groups of hydrous zirconium oxides but also minor mechanisms were identified including inner-sphere complexation and reduction to I<sup>-</sup>. The materials were observed to be easily and successively

regenerated using dilute acid. Hydrous zirconium oxides showed high potential for  $\text{IO}_3^-$  removal from waste solutions regarding technical (high selectivity and apparent capacity) and ecological/economic (feasible regeneration) aspects.

## 1. Equations for the capacity calculations

The apparent capacity  $q$  of analyte by ion exchanger for a single sample is calculated by Equation (SI1):

$$q = \frac{(c_i - c_f) \times V}{m} \quad (\text{Equation SI1})$$

where

$c_i$  = initial concentration of analyte in the solution.

$c_f$  = final concentration of analyte in the solution.

$V$  = volume of the solution

$m$  = mass of the dry ion exchanger

The corresponding uncertainty of uptake is calculated by Equation (SI2):

$$\Delta q = \sqrt{\left(\frac{V}{m} \times \Delta c_i\right)^2 + \left(\frac{V}{m} \times \Delta c_f\right)^2 + \left(\frac{(c_i - c_f)}{m} \times \Delta V\right)^2} \quad (\text{Equation SI2})$$

Equation (SI2) does not take the errors of mass (0.05 %) into account as it is insignificant compared to errors concentration measurements (relative errors ( $1 \sigma$ ) 0.5 – 50 % depending on the count rate for  $\gamma$ -detector or 0.1 unit for pH detector).

The total  $q_{\text{total}}$  is the sum of  $q_i$  of the individual fractions described by Equation (SI3):

$$q_{\text{total}} = \sum_{i=1}^n q_i \quad (\text{Equation SI3})$$

The corresponding uncertainty of uptake is calculated by Equation (SI4):

$$\Delta q_{total} = \sqrt{\sum_{i=1}^n \Delta q_i^2}$$

(Equation SI4)

## 2. B: Application on selective $\text{IO}_3^-$ removal from waste solutions

Table 1 Comparison of  $^{127}\text{IO}_3^-$  and  $^{125}\text{IO}_3^-$  apparent capacities determined in two parallel column experiments (total iodate concentration: 1 mM).

| Iodine isotope        | Analysis method    | Apparent capacity<br>[mmol/g] | Feed pH |
|-----------------------|--------------------|-------------------------------|---------|
| $^{125}\text{IO}_3^-$ | $\gamma$ -detector | $0.42 \pm 0.02$               | 5.6     |
| $^{127}\text{IO}_3^-$ | HPLC-ICP-MS        | $0.44 \pm 0.02$               | 5.7     |

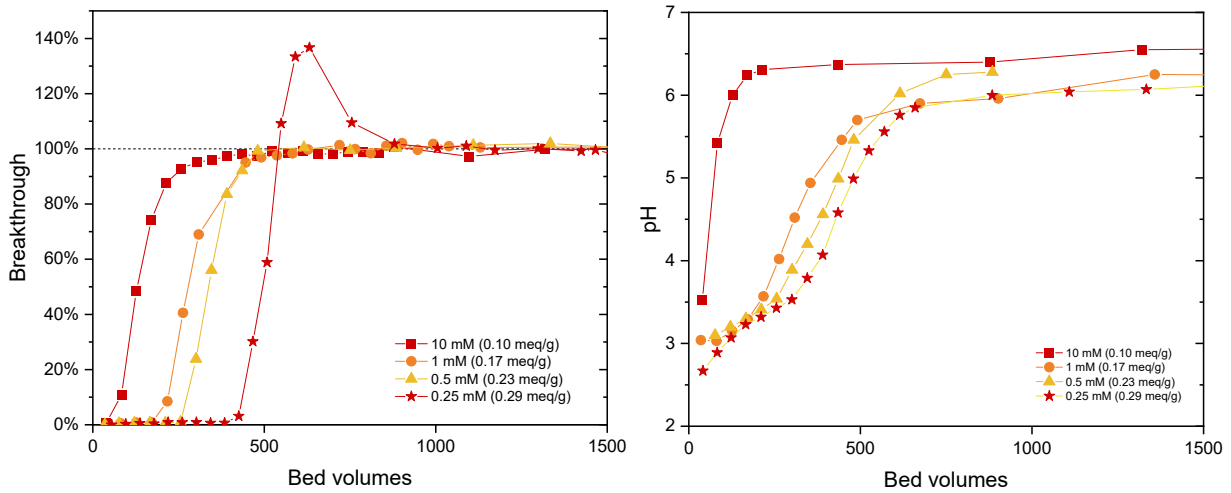

Figure 1  $\text{IO}_3^-$  ( $c = 1 \text{ mM}$ ) breakthrough and pH curves for  $\text{ZrO}_2$  columns in different  $\text{SO}_4^{2-}$  concentrations. The equilibrium uptake is represented in parentheses of each legend. The uncertainties are not shown in the graph due to the clarity but were below 4.0 % for the determined apparent capacities.

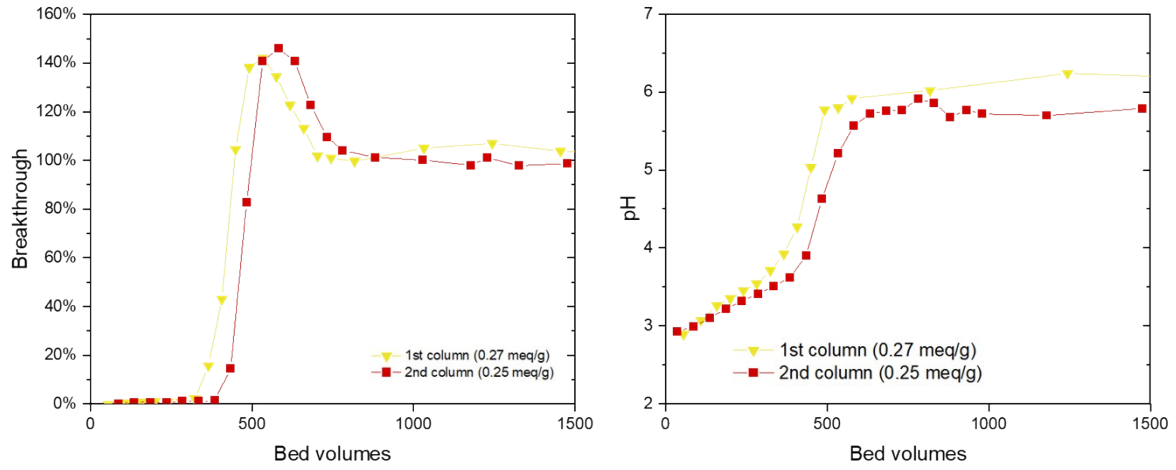

Figure 2  $IO_3^-$  breakthrough and pH curves of two repetitions of  $ZrSbO_2$  columns in  $0.25\text{ mM } SO_4^{2-}$  and  $1\text{ mM } IO_3^-$ .

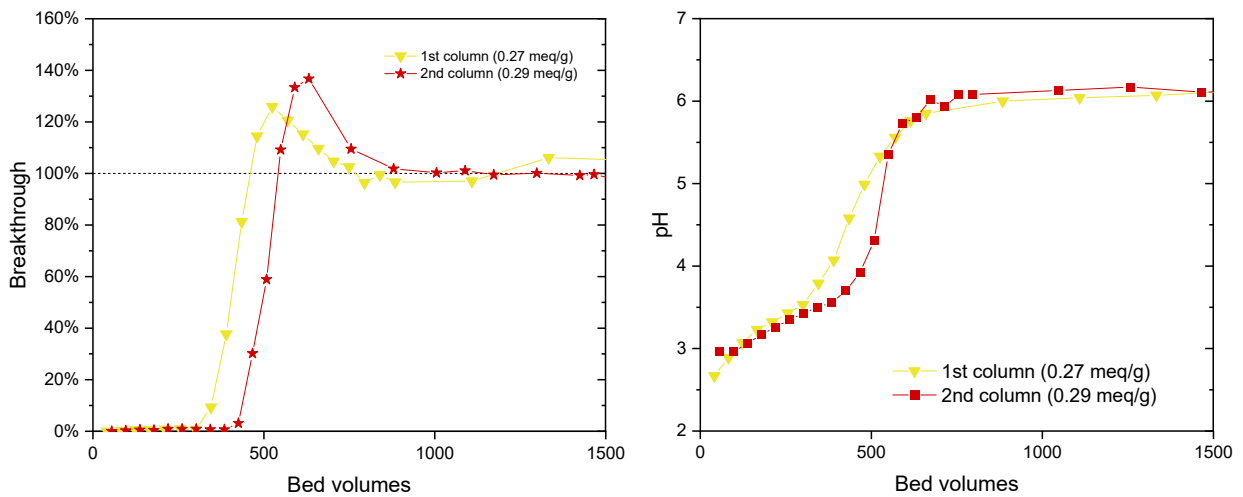

Figure 3  $IO_3^-$  breakthrough and pH curves of two repetitions of  $ZrO_2$  columns in  $0.25\text{ mM } SO_4^{2-}$  and  $1\text{ mM } IO_3^-$ .

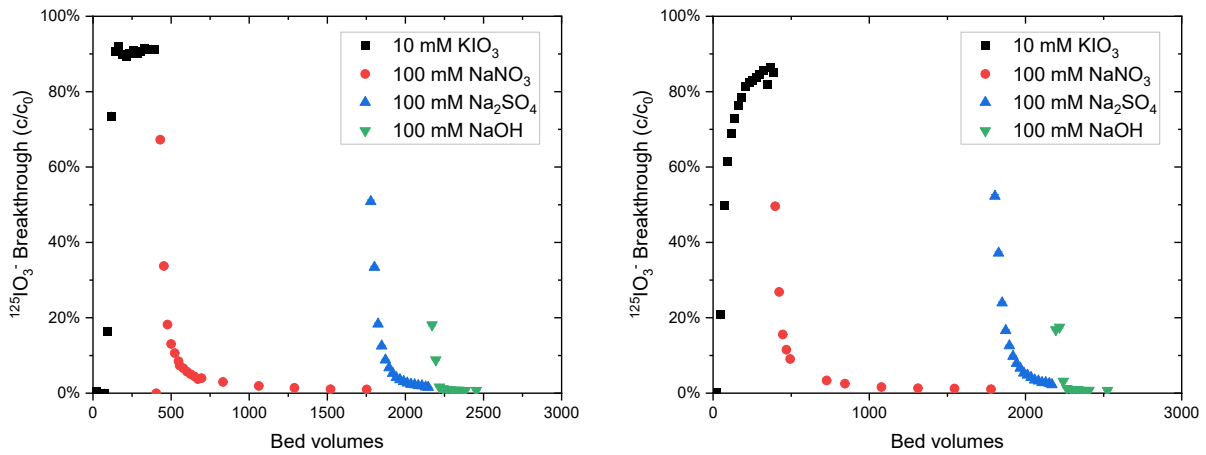

Figure 4 Column elution curves for different eluents for  $Zr(Sb)O_2$  (left) and  $ZrO_2$  (right) for the column elution experiment with  $NaNO_3$ ,  $Na_2SO_4$  and  $NaOH$  as eluents.

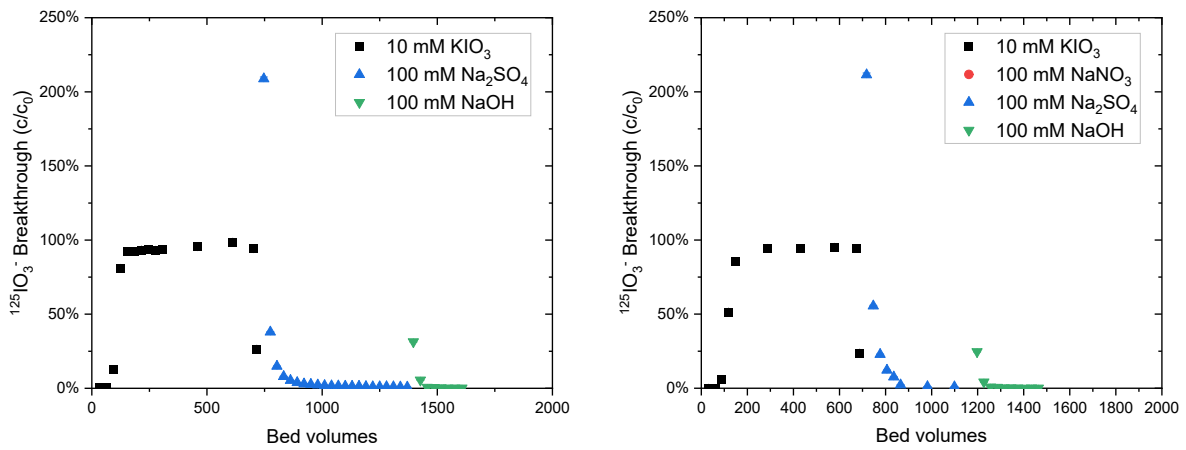

Figure 5 Column elution curves for different eluents for  $Zr(Sb)O_2$  (left) and  $ZrO_2$  (right) for the column elution experiment with  $Na_2SO_4$  and  $NaOH$  as eluents.

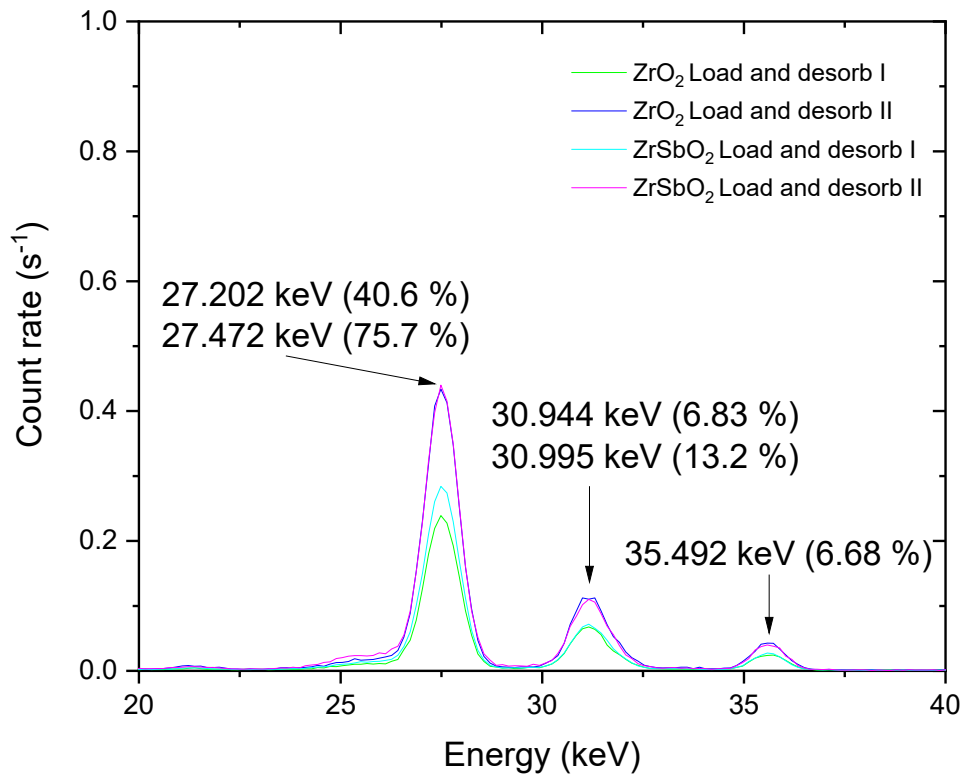

Figure 6 The gamma spectra of  $^{125}\text{I}$  of the measured used column beds after the column elution experiments.

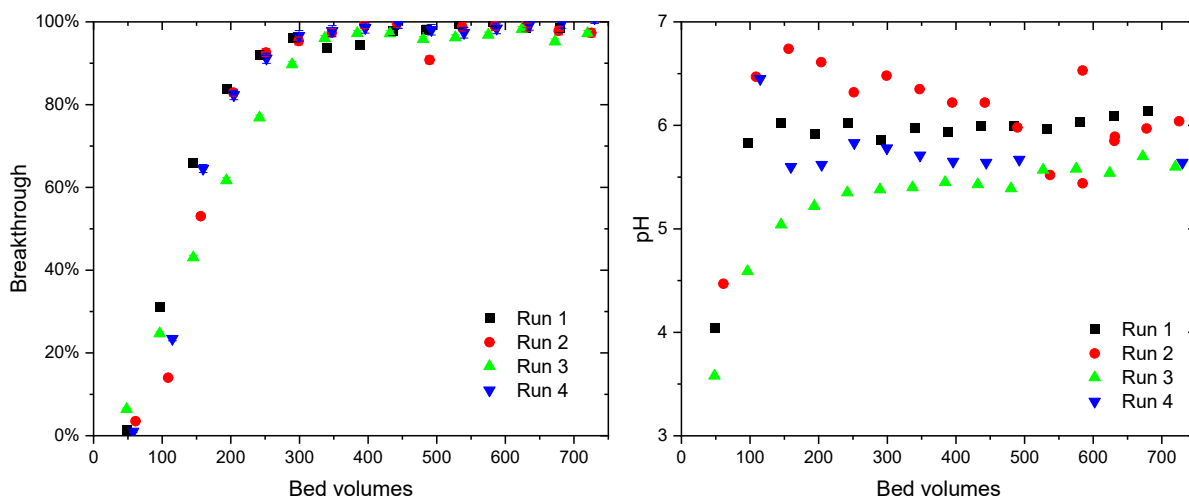

Figure 7  $^{125}\text{IO}_3^-$  breakthrough and corresponding pH curves as function of bed volumes for each load cycle in regeneration experiment with loading solution containing  $10\text{ mM SO}_4^{2-}$  and  $1\text{ mM IO}_3^-$ .

### 3. Solid sample characterization

#### 3.1. XRD

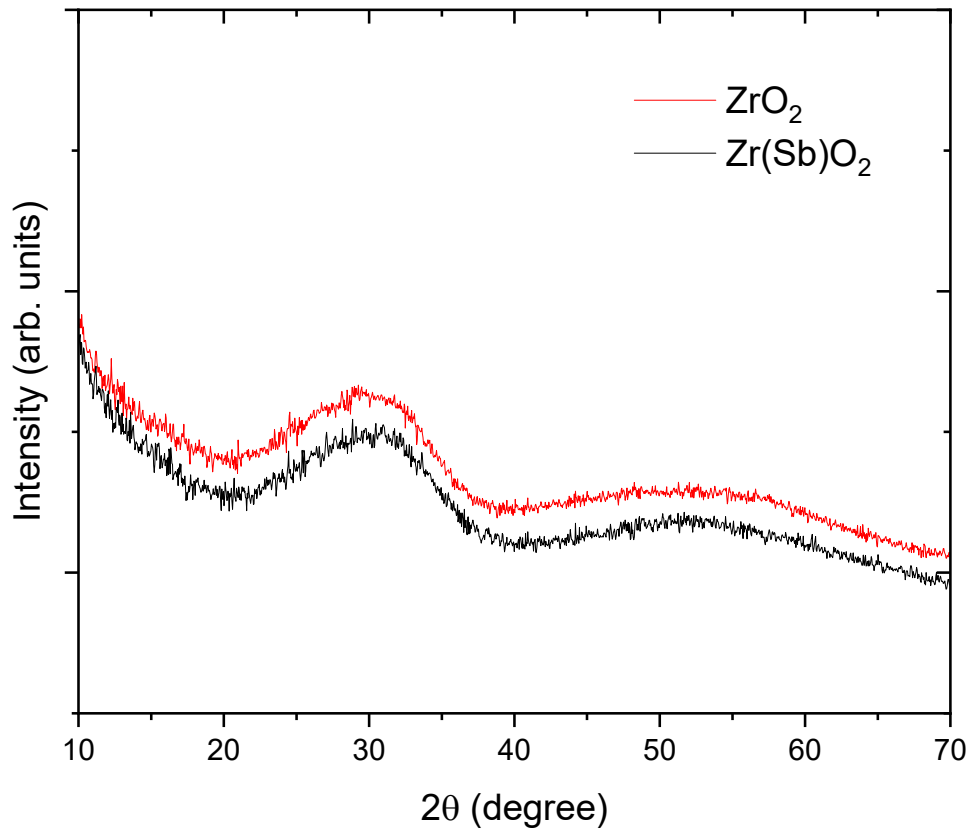

Figure 8 Powder XRD diffractograms of  $ZrO_2$  and  $Zr(Sb)O_2$ .

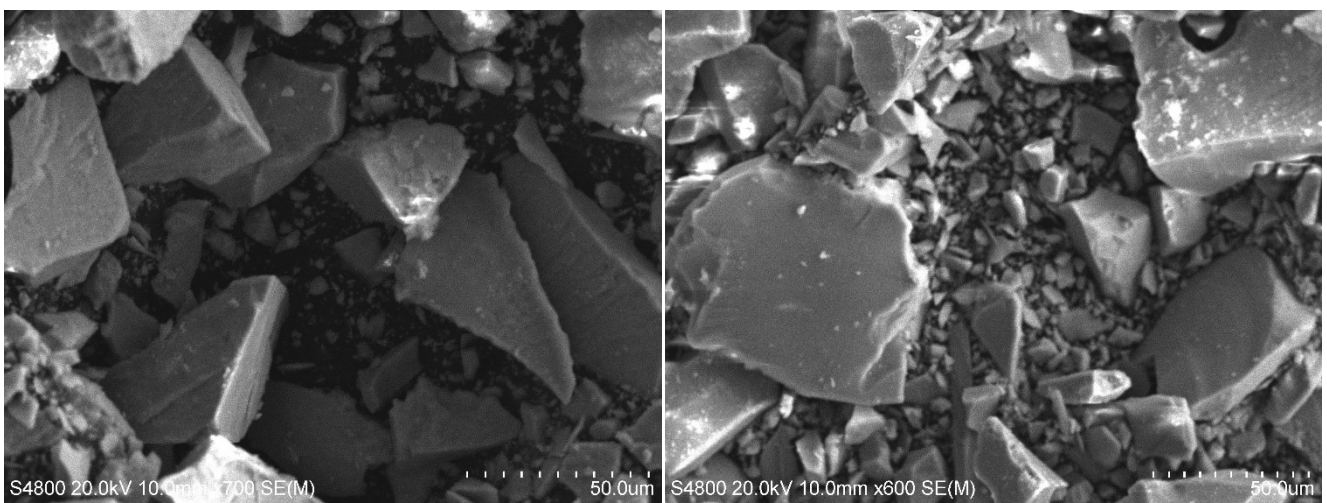

#### 3.2. FE-SEM





### 3.3. EXAFS fittings

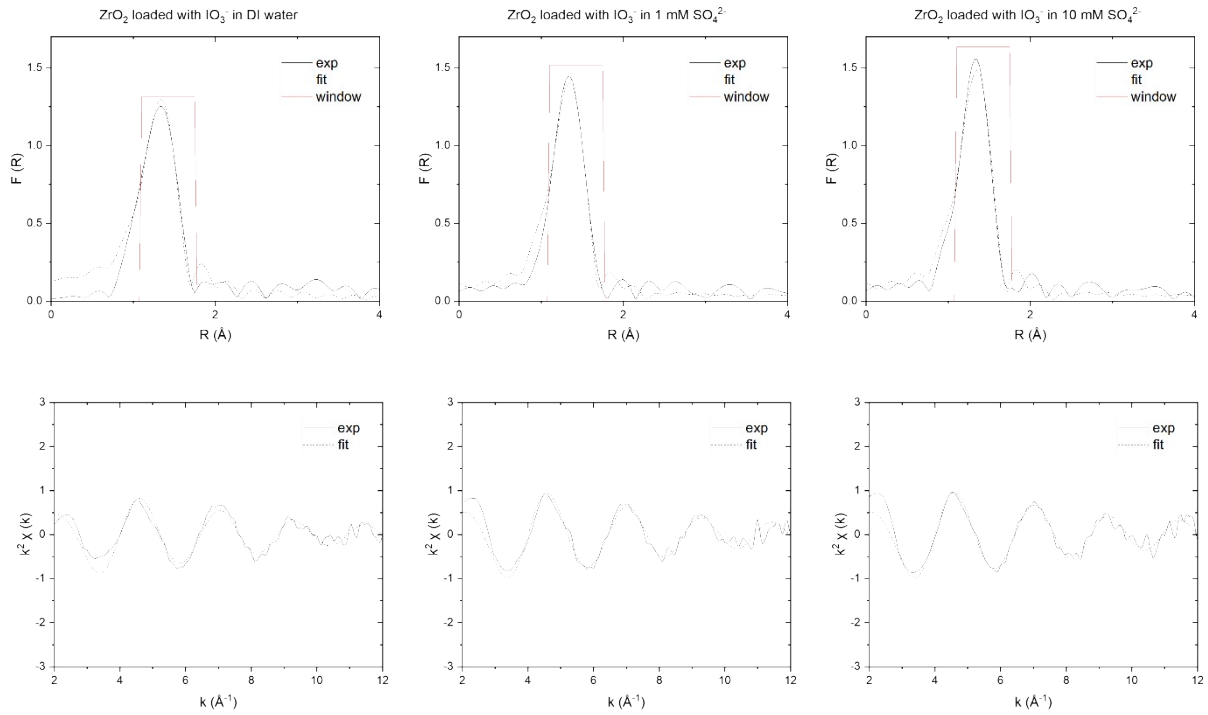

Figure 10 I K-edge EXAFS fits in  $k$ - and  $R$ -space for  $ZrO_2$  samples.

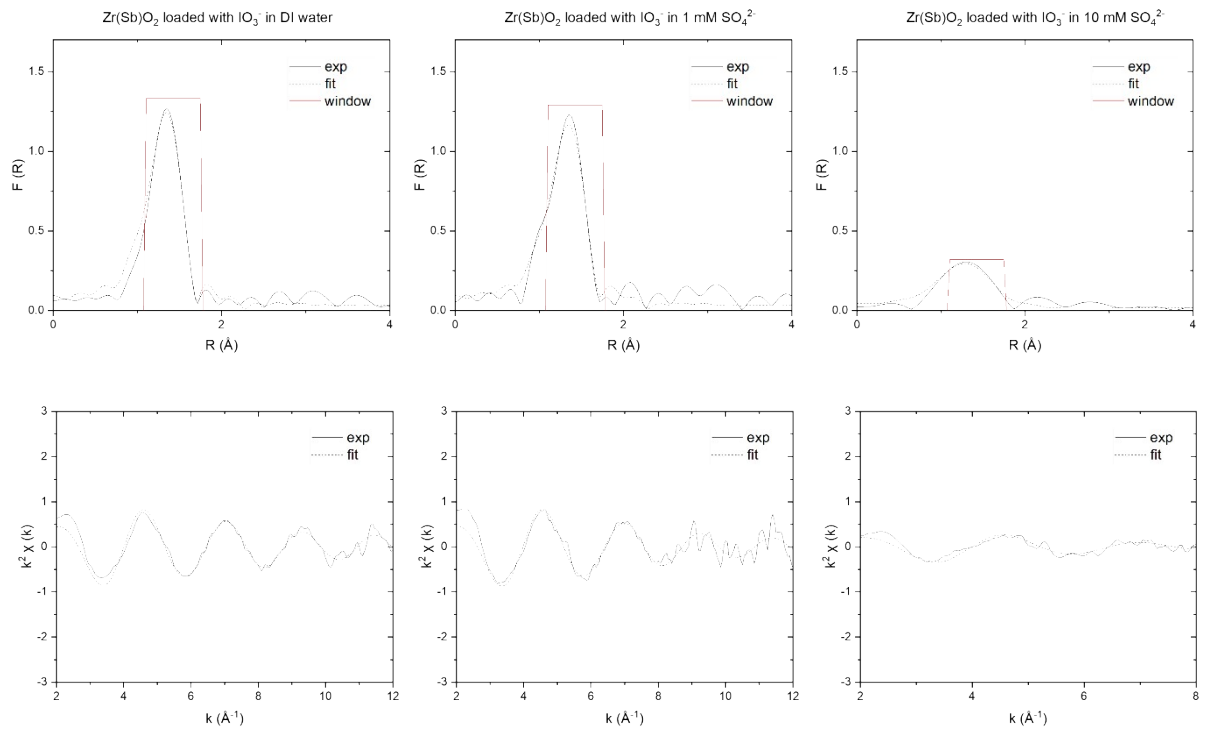

Iodine

Figure 11 I EXAFS fits of  $Zr(Sb)O_2$

Table 2 Fitting parameters for I K-edge EXAFS spectra measured for  $\text{ZrO}_2$  and  $\text{Zr}(\text{Sb})\text{O}_2$  loaded with  $\text{IO}_3^-$  in different conditions.  $S_0^2$  ( $0.98 \pm 0.02$ ) and  $\Delta E_0$  were extracted from the fit of  $\text{Zr}(\text{IO}_3)_4$  reference sample and set as global parameters. The combined R-factor for the fit was 0.0097.

| Sample                              | $\Delta E$<br>eV | R<br>Å  | N      | $\sigma^2$ |
|-------------------------------------|------------------|---------|--------|------------|
| <b>ZrO<sub>2</sub></b>              |                  |         |        |            |
| DI water                            | 15.2(1)          | 1.81(1) | 3.0(2) | 0.003(1)   |
| 1 mM SO <sub>4</sub> <sup>2-</sup>  | 15.2(1)          | 1.82(1) | 3.3(1) | 0.002(1)   |
| 10 mM SO <sub>4</sub> <sup>2-</sup> | 15.2(1)          | 1.81(1) | 3.3(2) | 0.002(1)   |
| <b>Zr(Sb)O<sub>2</sub></b>          |                  |         |        |            |
| DI water                            | 15.2(1)          | 1.81(1) | 2.9(1) | 0.002(1)   |
| 1 mM SO <sub>4</sub> <sup>2-</sup>  | 15.2(1)          | 1.82(1) | 3.1(3) | 0.003(2)   |
| 10 mM SO <sub>4</sub> <sup>2-</sup> | 15.2(1)          | 1.83(2) | 1.7(3) | 0.014(3)   |

## Zirconium

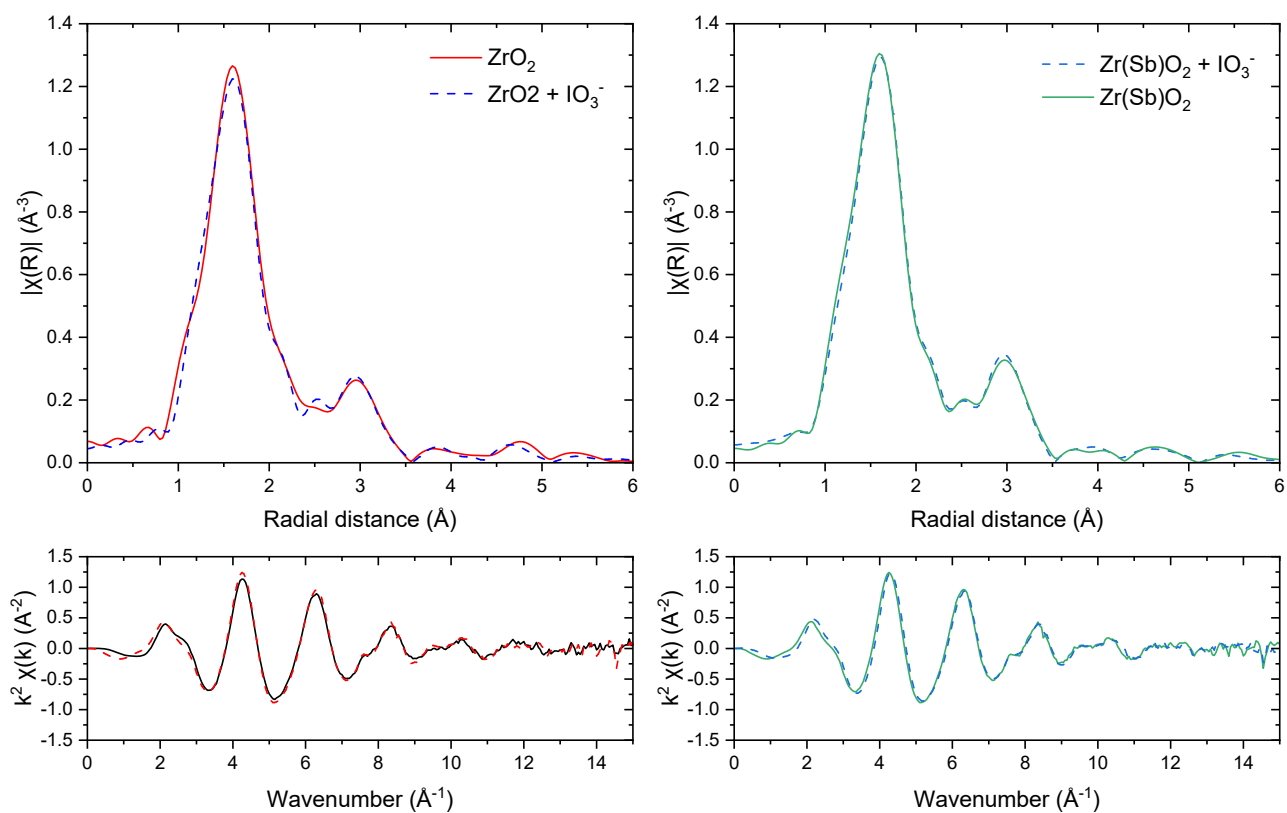

Figure 12 Zr K-edge EXAFS and Fourier transformed spectra of ZrO<sub>2</sub> (left graph) and Zr(Sb)O<sub>2</sub> (right graph) before and after IO<sub>3</sub><sup>-</sup> adsorption. FT window of 3 to 12  $\text{\AA}^{-1}$  was used.

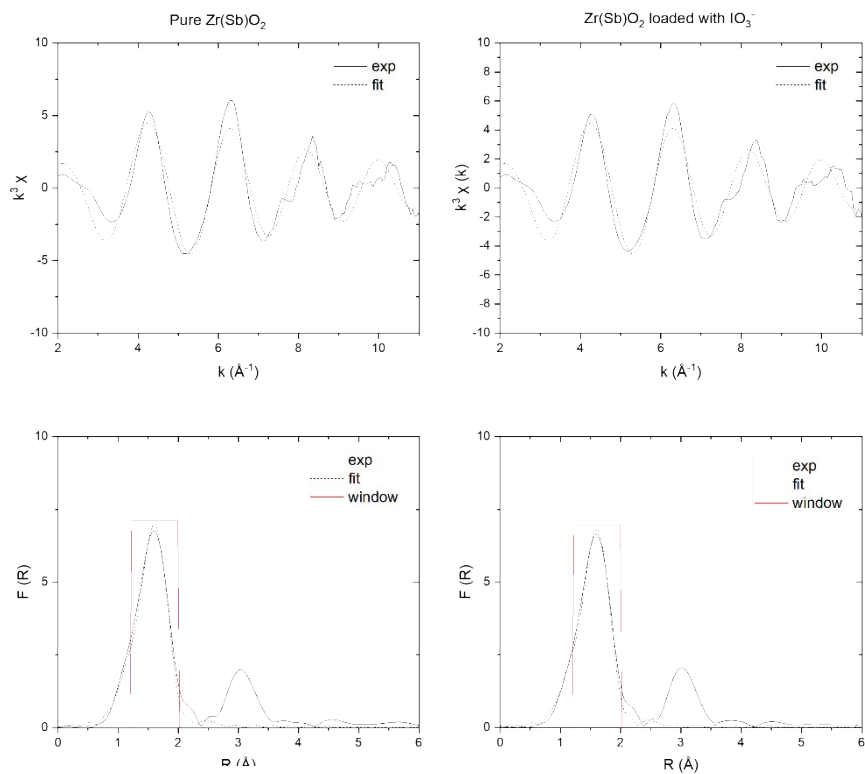

Figure 13 Zr K-edge EXAFS fits in R- and k-space for pure and loaded  $Zr(Sb)O_2$ .

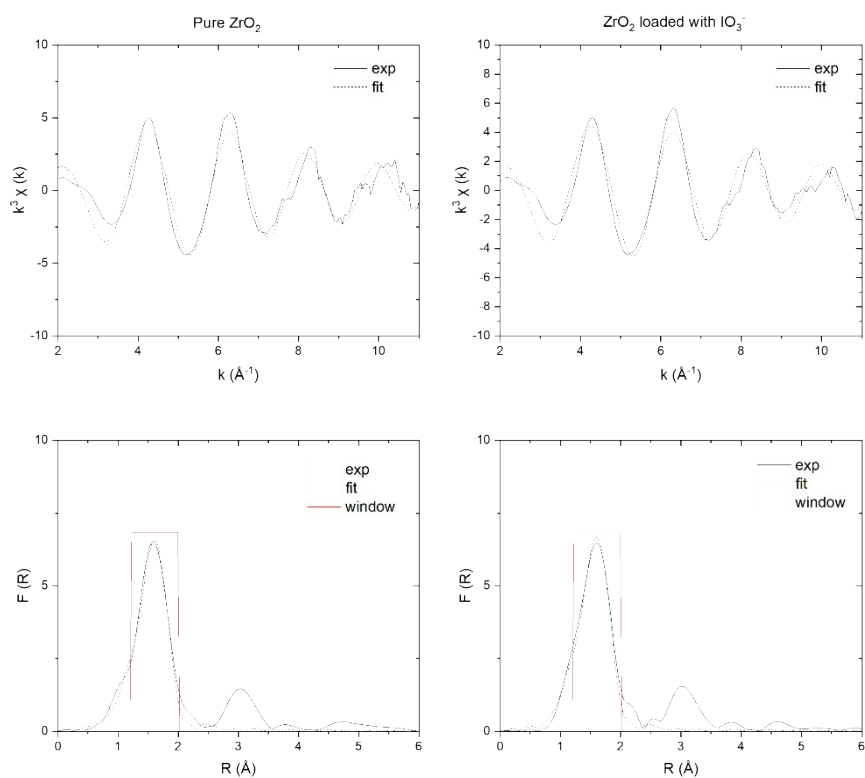

Figure 14 Zr K-edge EXAFS fits in R- and k-space for pure and loaded  $ZrO_2$ .

Table 3 Fitting parameters for Zr K-edge EXAFS spectra measured for pure and IO<sub>3</sub><sup>-</sup> loaded ZrO<sub>2</sub> and Zr(Sb)O<sub>2</sub>. S<sub>0</sub><sup>2</sup> (0.69 ± 0.03) and ΔE<sub>0</sub> were extracted from the fit of ZrO<sub>2</sub> sample and set as global parameters. The combined R-factor for the fit was 0.0163.

| Sample                              | ΔE <sub>0</sub><br>eV | R<br>Å  | N         | σ <sup>2</sup> |
|-------------------------------------|-----------------------|---------|-----------|----------------|
| <b>ZrO<sub>2</sub></b>              |                       |         |           |                |
| Pure                                | -3.9(5)               | 2.15(1) | 6 (fixed) | 0.007(2)       |
| IO <sub>3</sub> <sup>-</sup> loaded | -3.9(5)               | 2.15(1) | 6.2(8)    | 0.008(1)       |
| <b>Zr(Sb)O<sub>2</sub></b>          |                       |         |           |                |
| Pure                                | -3.9(5)               | 2.15(1) | 6.5(9)    | 0.007(1)       |
| IO <sub>3</sub> <sup>-</sup> loaded | -3.9(5)               | 2.15(1) | 6.2(8)    | 0.007(1)       |

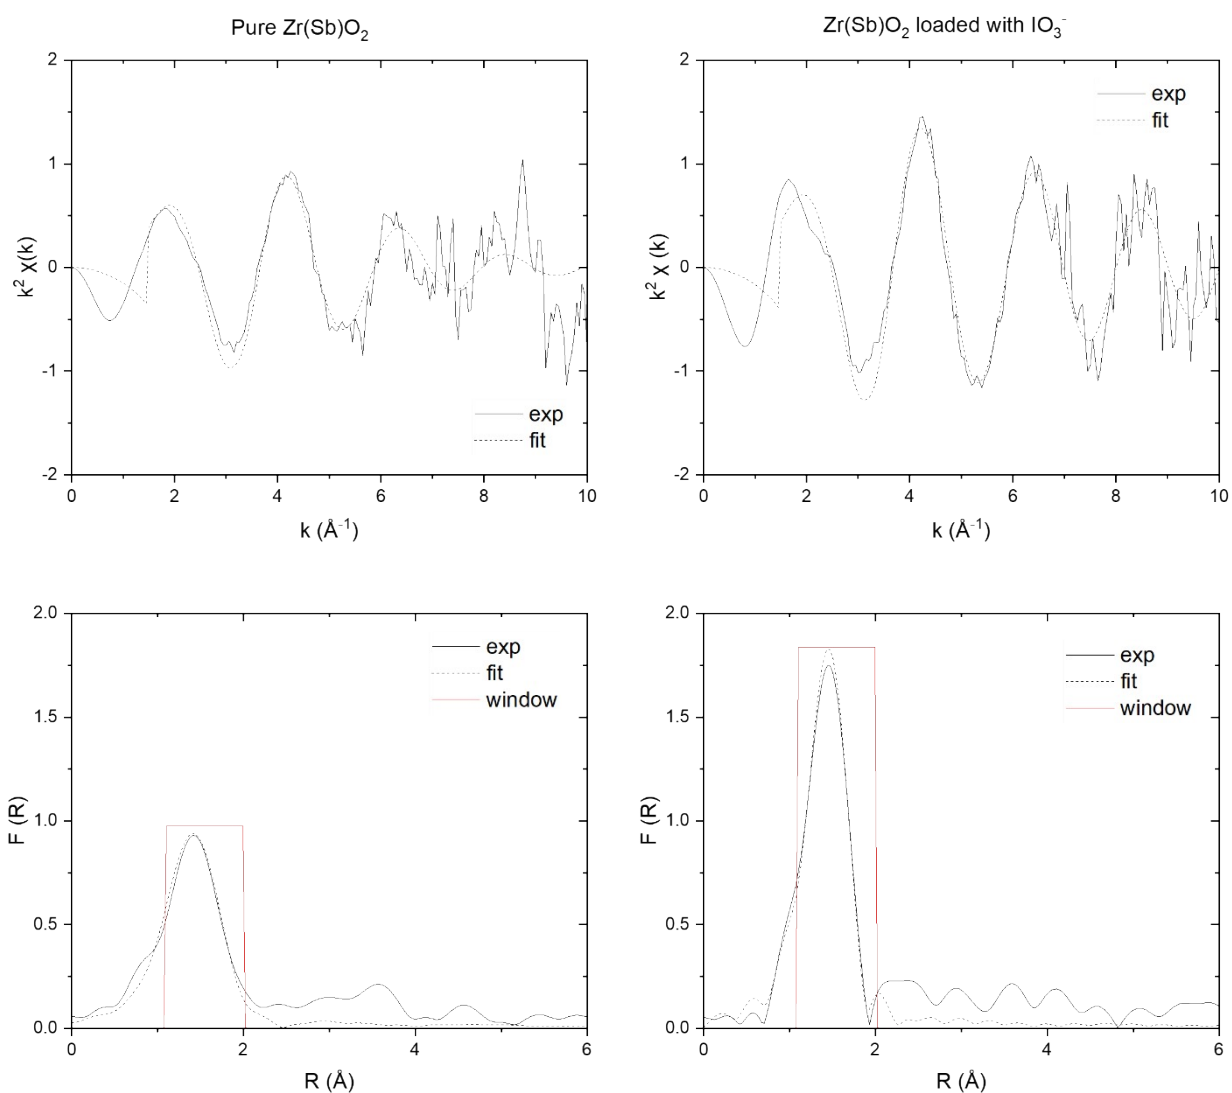

### Antimony

Table 4 Fitting parameters for Sb K-edge EXAFS spectra measured for pure and  $\text{IO}_3^-$  loaded  $\text{ZrO}_2$  and  $\text{Zr(Sb)O}_2$ .  $S_0^2$  ( $0.74 \pm 0.04$ ) and  $\Delta E_0$  were extracted from the fit of  $\text{Sb}_2\text{O}_3$  sample and set as global parameters. The combined R-factor for the fit was 0.012. R-space 1.1 – 2.0 Å based on k-space 2.7 – 8 Å<sup>-1</sup> (pure) or 2.7 – 10 Å<sup>-1</sup> (loaded).

| Sample                     | $\Delta E$<br>eV | R<br>Å  | N    | $\sigma^2$ |
|----------------------------|------------------|---------|------|------------|
| <b>Zr(Sb)O<sub>2</sub></b> |                  |         |      |            |
| Pure                       | 8.1(6)           | 1.99(3) | 6(2) | 0.012(5)   |
| $\text{IO}_3^-$ loaded     | 8.1(6)           | 1.97(2) | 6(1) | 0.002(3)   |

Figure 15 Sb K-edge EXAFS fits in R- and k-space for pure and loaded Zr(Sb)O<sub>2</sub>.

### 3.4. GC-MS chromatograms

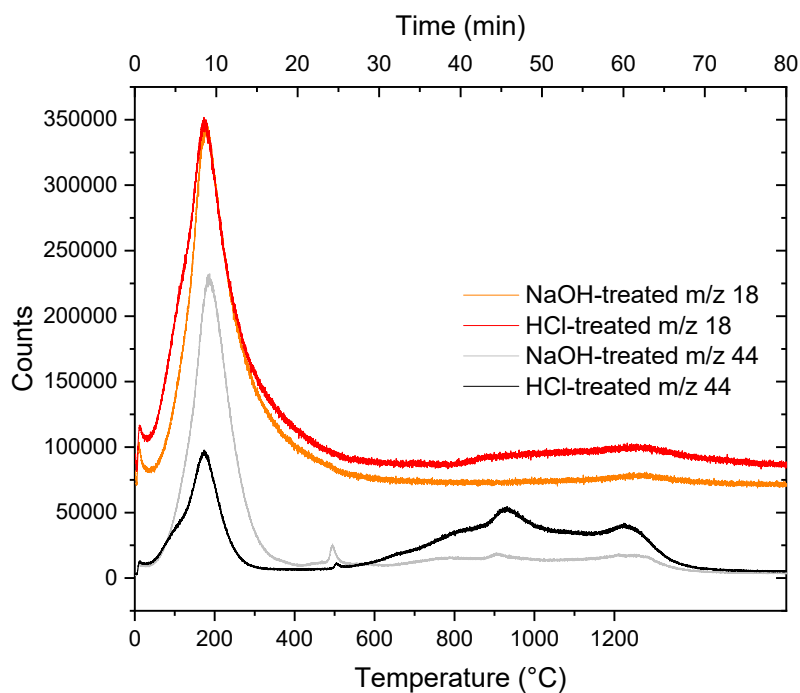

Figure 16 GC-MS chromatogram for  $m/z$  18 ( $H_2O$ ) and  $m/z$  44 ( $CO_2$ ) for HCl and NaOH treated  $ZrSbO_2$ .

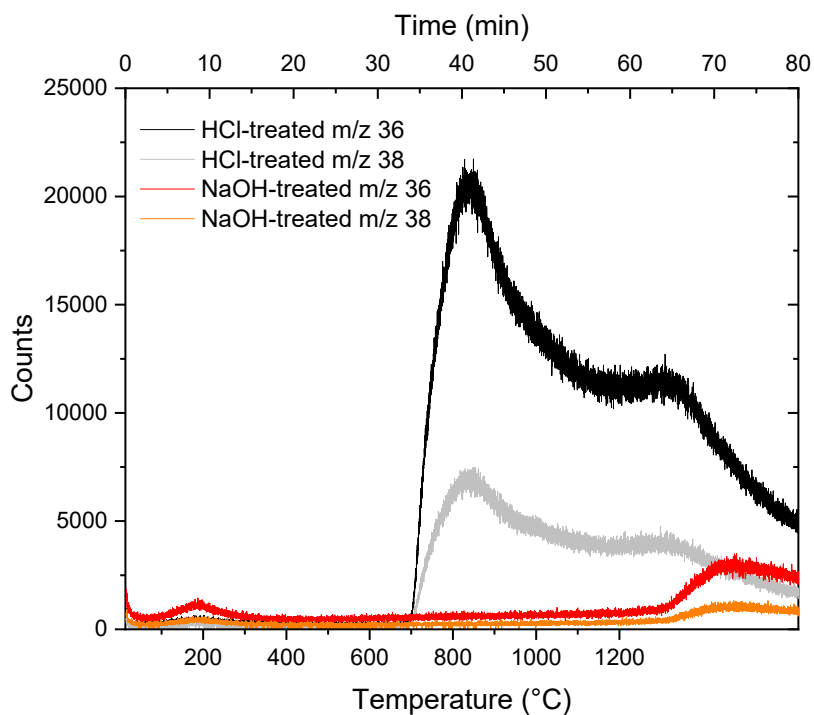

Figure 17 GC-MS chromatogram for  $m/z$  36 ( $H^{35}Cl$ ) and  $m/z$  38 ( $H^{37}Cl$ ) for HCl and NaOH treated  $ZrSbO_2$ .

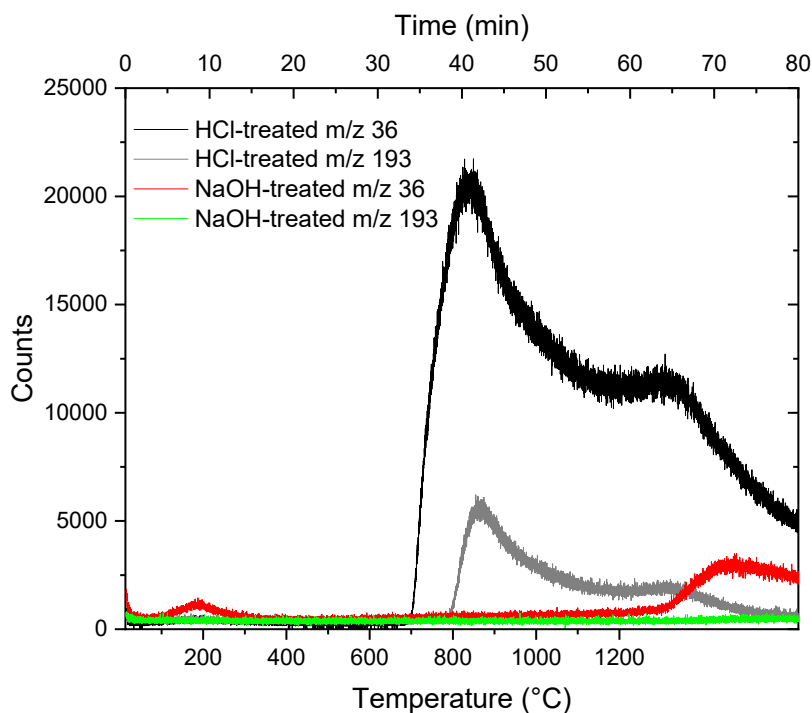

Figure 18 GC-MS chromatogram for  $m/z$  36 (HCl) and  $m/z$  193 ( $SbCl_3$ ) for HCl and NaOH treated  $ZrSbO_2$ .

## Acknowledgements

We thank Timo Hatanpää for his help with the TGA experiments and Bree Revill for her help with the regeneration column experiments. We acknowledge DESY (Hamburg, Germany), a member of the Helmholtz Association HGF, for the provision of experimental facilities. Parts of this research were carried out at PETRA III P64, and we would like to thank the beamline scientists Wolfgang Caliebe and Akhil Tayal for their efforts during the XAS measurements. Beamtime was allocated for proposal I-20200428 EC. SEM imaging and XRD measurements were done in ALD Center Finland research infrastructure. The financial support from Doctoral Program in Chemistry and Molecular Sciences (CHEMS) is gratefully acknowledged.
